# Supplementary material for: Tip-enhanced Raman spectroscopy of graphene-like and graphitic platelets on ultraflat gold nanoplates
Source: Royal Society of Chemistry journal article supplement (doi:10.1039/c4cp05252h), 2015-01-01
Supplement: c4cp05252h1.pdf [file c4cp05252h1.pdf]

## **Tip-Enhanced Raman Spectroscopy of Graphene-like and Graphitic Platelets on Ultraflat Gold Nanoplates**

Farshid Pashaei,<sup>a</sup> Faranak Sharifi,<sup>b</sup> Giovanni Fanchini<sup>b</sup> and François Lagugné-Labarthe<sup>\*,a</sup>

<sup>a</sup>Department of Chemistry, Department of Physics & Astronomy and Centre for Advanced Materials and Biomaterials Research, University of Western Ontario , 1151 Richmond Street, London, Ontario, N6A 5B7, Canada. E-mail: flagugne@uwo.ca

<sup>b</sup> Department of Chemistry, Department of Physics and Centre for Advanced Materials and Biomaterials Research, University of Western Ontario , 1151 Richmond Street, London, Ontario, N6A 5B7, Canada.

**Supplementary information section**

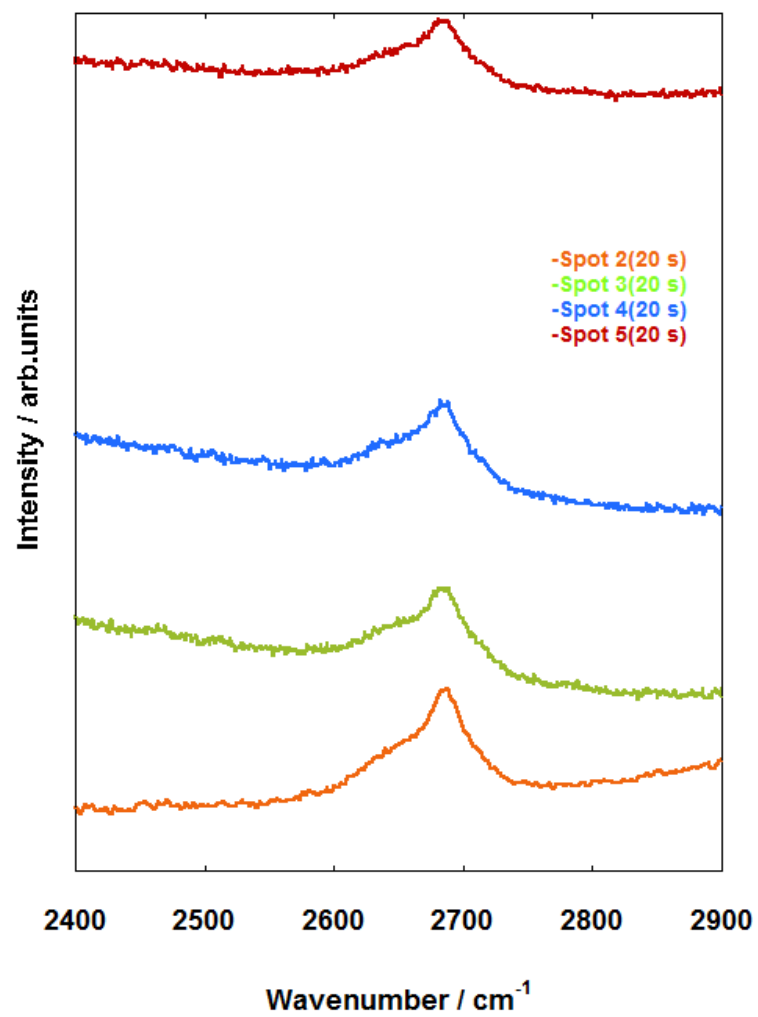

**SI 1:** Shape of the 2D modes measured at selected positions of the graphene-like platelet deposited over gold substrate.

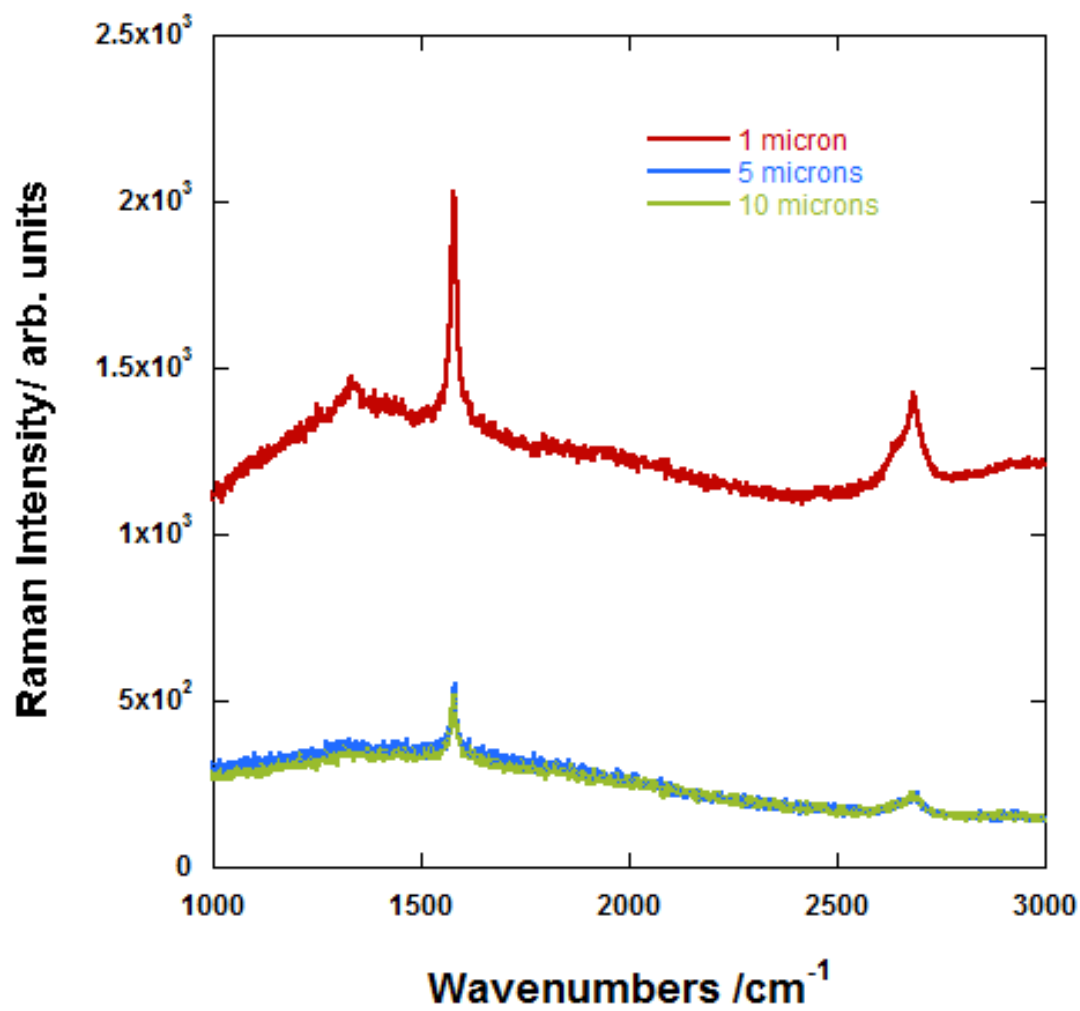

**SI 2:** Raman spectra measured with the tip-sample distance set at 1,5 and 10 microns.

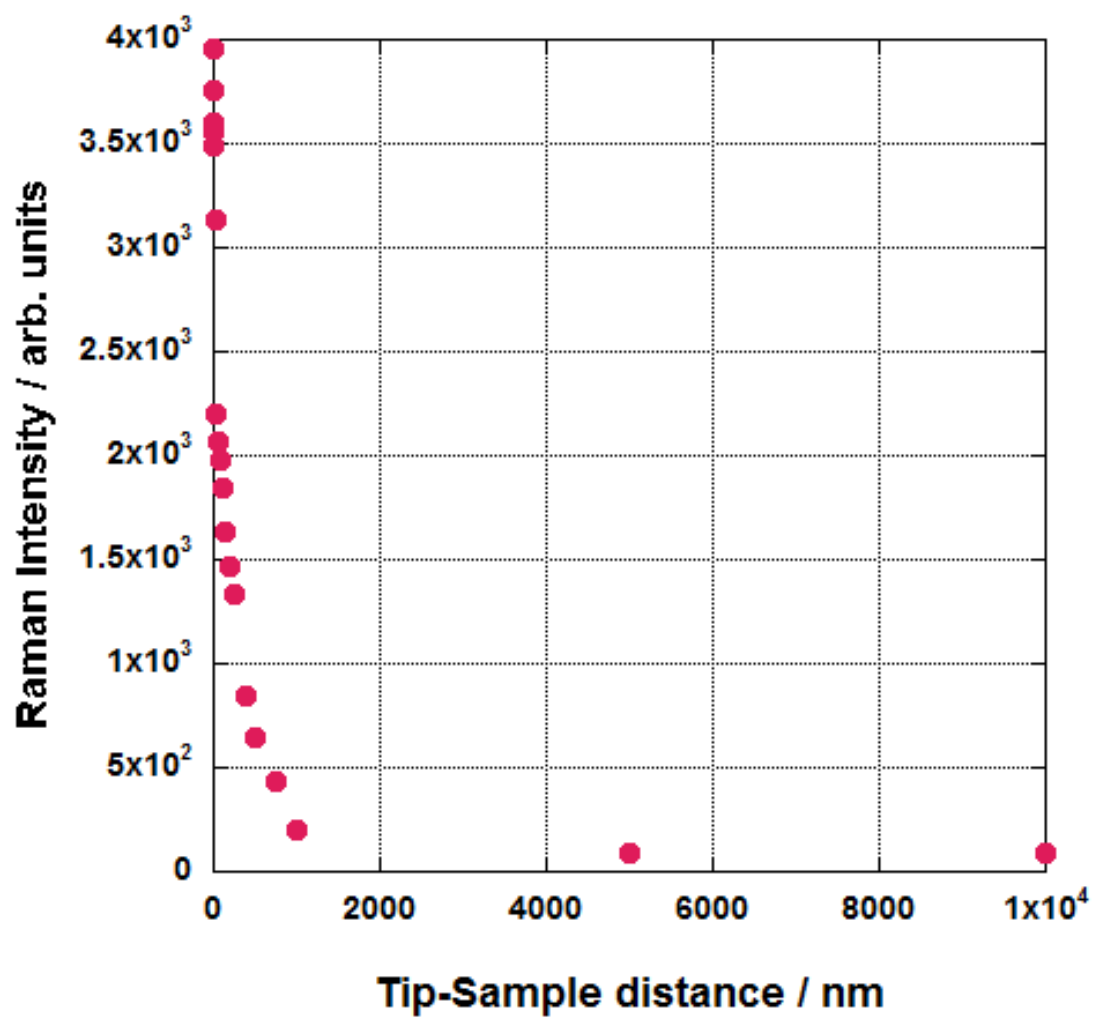

**SI 3** Raman intensity of the G band versus tip-sample distance (linear scale)
